# Supplementary material
Source: HighWire-hosted journal article supplement (https://oem.bmj.com/content/suppl/2005/11/18/62.12.907)
Supplement: 6212907webrefs.pdf [file 6212907webrefs.pdf]

## Additional references

### Useful websites

NICE HIA Gateway: [www.publichealth.nice.org.uk/page.aspx?o=HIAGateway](http://www.publichealth.nice.org.uk/page.aspx?o=HIAGateway) (accessed 11/08/2005)

WHO: [www.who.int/hia/en/](http://www.who.int/hia/en/) (accessed 11/08/2005)

WHO Europe Region [www.euro.who.int/healthimpact](http://www.euro.who.int/healthimpact) (accessed 11/08/2005)

### Examples of generic toolkits and guides

- Barnes R, Scott-Samuel A. *Health impact assessment: A ten minute guide*. Liverpool, IMPACT, 2002.
- Lehto J, Ritsatakis A. *Health impact assessment as a tool for inter-sectoral health policy: a discussion paper for a seminar at Gothenburg*. Brussels: WHO European Centre for Health Policy, 1999.
- Ministry of Health and Ministry Responsible for Seniors. *Health Impact Assessment Tool Kit: a resource for government analysts*. British Columbia, Canada: Population Health Resource Branch, Ministry of Health, 1994.
- Health Canada. *Canadian Handbook on HIA*. [http://www.hc-sc.gc.ca/ewh-semt/pubs/eval/handbook-guide/vol\\_1/index\\_e.html](http://www.hc-sc.gc.ca/ewh-semt/pubs/eval/handbook-guide/vol_1/index_e.html) (accessed 11/08/05)
- National Health and Medical Research Council. *National Framework for Environmental and Health Impact Assessment*. Canberra: Australian Government Publishing Service, 2004.
- New Zealand Ministry of Health. *A guide to health impact assessment*. Wellington: Ministry of Health, 2004. (supersedes Public health commission. *A guide to health impact assessment*. Wellington: Public Health Commission, 1995, and a subsequent document from 1998.) <http://www.moh.govt.nz> (accessed 11/08/2005)

- Fehr R. Environmental health impact assessment: Evaluation of a ten-step model. *Epidemiology* 1999;**10**:618–25.
- Conway L, Douglas M, Gavin S, *et al.* *HIA Piloting the Process in Scotland*. Glasgow: SNAP, 2000. <http://www.gla.ac.uk/external/ophis/PDF/hia.pdf> (accessed 11/08/2005)
- Douglas MJ, Conway L, Gorman D, *et al.* Developing principles for health impact assessment. *J Public Health Med* 2001;**23**:148–54.
- Mahoney M, Durham G. *Health impact assessment: a tool for policy development in Australia*. Faculty of Health and Behavioural Sciences, Deakin University: Deakin, Australia, 2002.
- Anonymous. *Health Impact Assessment: A Guide for Service Providers*. Brisbane: Queensland Health. 2003. <http://www.health.qld.gov.au/phs/Documents/sphun/20364.pdf> (accessed 11/08/2005)
- Doyle C, Metcalfe O, Devlin J. *Health Impact Assessment; a practical guidance manual*. Dublin & Belfast: The Institute of Public Health in Ireland. 2003. <http://www.publichealth.ie/> (accessed 11/08/2005)
- EPHIA. *European Policy Health Impact Assessment—A Guide (EPHIA)*. Liverpool: EPHIA group. 2004. <http://www.ihia.org.uk/ephia/reports/ephiaguide.pdf> (accessed 11/08/2005)
- Public Health Advisory Committee. *A Guide to HIA: A Policy Tool for New Zealand*. Wellington: Public Health Advisory Committee. 2004. 08-01-2005. [www.nhc.govt.nz/PHAC/publications/GuideToHIA.pdf](http://www.nhc.govt.nz/PHAC/publications/GuideToHIA.pdf) (accessed 11/08/2005)

- Welsh Health Impact Assessment Support Unit. The complete WHIASU (Welsh Health Impact Assessment Support Unit) Guide to HIA. Cardiff: Welsh Health Impact Assessment Support Unit. 2005.  
<http://www.whiasu.cardiff.ac.uk/docs/HSCWBSfinalguidance.doc> (accessed 11/08/2005)
- Vohra S, Cave B, Penner S. *HIA planning and report writing toolkit*. Brighton: SeahorseIA, 2003. [www.phel.nice.org.uk/hiadocs/Writing\\_Toolkit\\_v4.pdf](http://www.phel.nice.org.uk/hiadocs/Writing_Toolkit_v4.pdf) (accessed 11/08/2005)

## **Examples of topic-specific toolkits and guides**

### **Housing**

- Douglas M, Thomson H, Gaughan M. Health Impact Assessment of housing improvements: a guide. Glasgow: NHS Health Scotland: Scottish Health Impact Assessment Network and MRC Social and Public Health Sciences Unit, 2003.  
[http://www.phis.org.uk/pdf.pl?file=pdf/PHIS\\_HIAGuide.pdf](http://www.phis.org.uk/pdf.pl?file=pdf/PHIS_HIAGuide.pdf) (accessed 11/08/2005)
- ***Regeneration***
- Cave B, Curtis S. *Health impact assessment for regeneration projects. Volume i A practical guide*. London: QMUL, 2001.  
[www.geog.qmw.ac.uk/health/research/healthaction/Vol1.pdf](http://www.geog.qmw.ac.uk/health/research/healthaction/Vol1.pdf) (accessed 11/08/2005)

### **Transport**

- Transport and Health Study Group. *Carrying out a health impact assessment of a transport policy*. London: Faculty of Public Health Medicine, 2000.  
[www.fph.org.uk/policy\\_communication/downloads/publications/transport\\_and\\_health\\_booklet\\_2000.pdf](http://www.fph.org.uk/policy_communication/downloads/publications/transport_and_health_booklet_2000.pdf) (accessed 11/08/2005)

### **Learning from practice**

- Taylor L, Gowman N, Lethbridge J, *et al.* *Deciding if a health impact assessment is required (screening for HIA)*. London: Health Development Agency, 2003.
- Taylor L, Gowman N, Quigley R. *Addressing inequalities through health impact assessment*. London: Health Development Agency, 2003.

### **Policy documents**

- Banken R. *ECHP Health Impact Assessment Discussion Papers Number 1: Strategies for institutionalizing HIA*. Brussels: ECHP, WHO, 2001.  
[www.phel.gov.uk/hiadocs/19\\_echp\\_strategies\\_for\\_institutinalising\\_hia.pdf](http://www.phel.gov.uk/hiadocs/19_echp_strategies_for_institutinalising_hia.pdf) (accessed 11/08/05)
- Birley M. Global perspectives on health impact assessment. 1st UK HIA conference, 16 Nov 1998, Liverpool. 1999. London, Health Education Authority.
- Department of Health. *Policy appraisal and health*. London: HMSO, 1995.
- Douglas MJ, Conway L, Gorman D, *et al.* Developing principles for health impact assessment. *J Public Health Med* 2001;**23**:148–54.
- Scott-Samuel A. Health impact assessment. An idea whose time has come. *BMJ* 1996;**313**:183–84.
- Scott-Samuel A. Health impact assessment - theory into practice. *J Epidemiol Community Health* 1998;**52**:704–05.

### **Evidence**

- Thomson M, Petticrew M, Douglas M. Health impact assessment of housing improvements: incorporating research evidence. *J Epidemiol Community Health* 2003;**57**:11–16.

- Rapid reviews of evidence prepared for the HIAs of the London Mayor's Draft Strategies for London area available at: [www.londonhealth.gov.uk/allpubs.htm](http://www.londonhealth.gov.uk/allpubs.htm) (accessed 11/08/2005)

### **HIAs of projects**

- Birley M, Peralta GL. Health impact assessment of development projects. In: Vanclay F, Bronstein DA, eds. *Environmental and Social Impact Assessment*. Chichester: John Wiley & Sons, 1995.
- Cave B, Curtis S, Cooke A. *HIA for Groundwork Safe Route to Schools (SRTS) Project*. [www.phel.gov.uk/hiadocs/178\\_groundwork\\_safe\\_routes\\_to\\_school\\_hia.pdf](http://www.phel.gov.uk/hiadocs/178_groundwork_safe_routes_to_school_hia.pdf) (accessed 11/08/2005)
- Konradsen F, Chimbari M, Furu P, *et al.* The use of health impact assessments in water resource development: a case study from Zimbabwe. *Impact Assessment* 1997;**15**:55–72.
- Winters L, Scott-Samuel A. *Health impact assessment of the community safety projects Huyton SRB area*. Liverpool: Liverpool Public Health Observatory, 1997.

Many other examples can be found at

[www.phel.gov.uk/hiadocs/Decision\\_Making\\_HIA.pdf](http://www.phel.gov.uk/hiadocs/Decision_Making_HIA.pdf) (accessed 11/08/2005)

### **HIAs of policies**

- Mindell J, Sheridan L, Joffe M, *et al.* Health impact assessment as an agent of policy change: improving the health impacts of the mayor of London's draft transport strategy. *J.Epidemiol.Community Health* 2004;**58**:169–74.  
<http://jech.bmjournals.com/cgi/reprint/58/3/169.pdf> (accessed 11/08/2005)

### **Monitoring and evaluation**

- Taylor L, Gowman N, Quigley R. *Evaluating health impact assessment*. London: Health Development Agency, 2003.
- Close N. Alconbury Airfield Development health impact assessment evaluation report. Cambridge: Cambridgeshire Health Authority, 2001.
- Aziz MA, Radford J, McCabe J. The Finningley Airport HIA: a case study. In: Kemm J, Parry J, Palmer S, eds. *Health impact assessment*. Oxford: OUP, 2004.

### **HIA in EIA and SEA**

- Clark BD. *Integration of health impact assessment into the procedures of the Convention*. Ad hoc working group workshop on strengthening the health component of the Convention on Environmental Impact Assessment in a Transboundary context, 26–28.02.1997. Bilthoven, WHO-ECEH.
- Kemm JR. *Developing health impact assessment in Wales. Better Health, Better Wales*. Cardiff: Health Promotion Division, National Assembly for Wales, 1999.
- Kobusch AB, Fehr R, Serwe HJ, *et al.* [Evaluation of impact on health—a central responsibility of the public health service] Gesundheitsverträglichkeitsprüfung—eine Schwerpunktaufgabe des öffentlichen Gesundheitsdienstes. *Gesundheitswesen* 1995;**57**:207–13.
